1 **Host-symbiont population genomics provide insights into partner fidelity, transmission**  
2 **mode and habitat adaptation in deep-sea hydrothermal vent snails**

3

4 Corinna Breusing<sup>1\*</sup>, Maximilian Genetti<sup>2</sup>, Shelbi L. Russell<sup>3</sup>, Russell B. Corbett-Detig<sup>2</sup>, Roxanne  
5 A. Beinart<sup>1\*</sup>

6

7 <sup>1</sup>Graduate School of Oceanography, University of Rhode Island, Narragansett, RI 02882, USA

8 <sup>2</sup>Jack Baskin School of Engineering, University of California Santa Cruz, Santa Cruz, CA 95064,  
9 USA

10 <sup>3</sup>Department of Molecular, Cell, and Developmental Biology, University of California Santa  
11 Cruz, Santa Cruz, CA 95064, USA

12

13 \*Corinna Breusing, Roxanne A. Beinart

14 **Email:** [corinnabreusing@gmail.com](mailto:corinnabreusing@gmail.com), [rbeinart@uri.edu](mailto:rbeinart@uri.edu)

15

16 **Author Contributions:** C.B. and R.A.B. designed the study with advice from S.L.R. and R.C.D.  
17 C.B. performed data analyses and wrote the first draft of the paper. M.G. prepared Illumina  
18 sequencing libraries. All authors contributed to data interpretation and writing of the manuscript.

19

20 **Competing Interest Statement:** The authors declare no competing interests.

21

22 **Classification:** Biological Sciences, Evolution

23

24 **Keywords:** Chemosynthetic symbiosis, hydrothermal vents, host-symbiont population genomics,  
25 habitat adaptation, symbiont transmission, symbiont specificity

26

27 **This PDF file includes:**

28 Main Text

29 Figures 1 to 6

30 Tables 1 to 1

31 **Abstract**

32 Symbiont specificity, both at the phylotype and strain level, can have profound consequences for  
33 host ecology and evolution. However, except for insights from a few model symbiosis systems,  
34 the degree of partner fidelity and the influence of host versus environmental factors on symbiont  
35 composition are still poorly understood. Nutritional symbioses between invertebrate animals and  
36 chemosynthetic bacteria at deep-sea hydrothermal vents are examples of relatively selective  
37 associations, where hosts affiliate only with particular, environmentally acquired phylotypes of  
38 gammaproteobacterial or campylobacterial symbionts. In hydrothermal vent snails of the sister  
39 genera *Alviniconcha* and *Ifremeria* this phylotype specificity has been shown to play a role in  
40 habitat distribution and partitioning among different holobiont species. However, it is currently  
41 unknown if fidelity goes beyond species level associations that might influence genetic  
42 structuring, connectivity and habitat adaptation of holobiont populations. We used metagenomic  
43 analyses to assess sequence variation in hosts and symbionts and identify correlations with  
44 geographic and environmental factors. Our analyses indicate that host populations are not  
45 differentiated across a ~800 km gradient, while symbiont populations are clearly structured  
46 between vent locations due to a combination of neutral and selective processes. Overall, these  
47 results suggest that host individuals flexibly associate with locally adapted strains of their  
48 specific symbiont phylotypes, which supports a long-standing but untested paradigm of the  
49 benefits of horizontal transmission. Strain flexibility in these snails likely enables host  
50 populations to exploit a range of habitat conditions, which might favor wide-spread genetic  
51 connectivity and ecological resilience unless physical dispersal barriers are present.

52

53 **Significance Statement**

54 Symbiont composition in horizontally transmitted symbioses is influenced by a combination of  
55 host genetics, environmental conditions and geographic barriers. Yet the relative importance of  
56 these factors and the effects of adaptive versus neutral evolutionary forces on symbiont  
57 population structure remain unknown in the majority of marine symbioses. To address these  
58 questions, we applied population genomic approaches in four species of deep-sea hydrothermal  
59 vent snails that live in obligate association with chemosynthetic bacteria. Our analyses show that  
60 host genetics plays a minor role compared to environment for symbiont strain composition  
61 despite specificity to symbiont species and corroborate a long-standing hypothesis that vent

62 invertebrates affiliate with locally adapted symbiont strains to cope with the variable habitat  
63 conditions characterizing hydrothermal vents.

64

## 65 **Introduction**

66 Mutualistic relationships between eukaryotes and bacterial microbes are ubiquitous in nature.  
67 Symbionts enable hosts to gain access to novel resources and habitats, provide protection against  
68 pathogens and predators, and can be essential for the host's diet (1, 2). For symbiotic  
69 associations to persist over evolutionary time, hosts must successfully transmit their symbionts  
70 from one generation to the other, either through symbiont acquisition from the environment  
71 (horizontal transmission), direct inheritance of symbiont lineages through the host germline  
72 (vertical transmission) or a combination of both mechanisms (mixed transmission) (3, 4). The  
73 mode of transmission has significant implications for the composition and variation of symbionts  
74 within and between host individuals. Vertical transmission typically results in strong genetic  
75 coupling between host and symbiont lineages and an accompanied reduction in intra-host  
76 symbiont diversity (3). By contrast, horizontal transmission exposes aposymbiotic hosts to a  
77 potentially heterogenous environmental pool of symbiont lineages (3), which can promote the  
78 formation of generalist partnerships, where multiple hosts and symbionts associate with each  
79 other, to more specialized associations between only one or a few potential partners (1, 5). This  
80 range is often referred to as host-symbiont specificity, which can vary in its taxonomic level for  
81 both partners depending on the symbiotic system. The degree of partner fidelity and its effect on  
82 symbiont composition can have dramatic impacts on holobiont functioning (6). For example,  
83 host-symbiont specificity, both at the species and genotype level, is crucial for light production  
84 in bioluminescent squid (7), while shifts in microbiome assemblages have been shown to affect  
85 phytoplankton growth rates (8) and the efficiency of nitrogen fixation in nodule-forming legumes  
86 (9–11).

87 Environmental transmission of obligate symbionts is particularly common in marine  
88 ecosystems (2). However, despite its importance for host biology, the relative contributions of  
89 host genetic, environmental and geographical factors to symbiont composition remain  
90 understudied in most horizontally transmitted marine symbioses. It has long been hypothesized  
91 that horizontal transmission in marine symbioses enables host organisms to associate with locally  
92 adapted symbiont strains, conferring fitness advantages in spatially and temporally variable

93 marine habitats (3, 12–14). Especially for long-dispersing aposymbiotic larvae that are likely to  
94 encounter new habitat conditions when they settle, association with a locally adapted symbiont  
95 strain may be advantageous compared to carrying a vertically transmitted symbiont that might be  
96 maladapted at a non-native site. This hypothesis has been indirectly supported by evidence that  
97 marine animals with horizontally transmitted obligate microbial symbionts often host location-  
98 specific strains (14–19). However, the influence of local adaptation relative to neutral  
99 evolutionary processes on symbiont geographic structure and genomic traits has not been  
100 formally evaluated.

101         Chemosynthetic animal-microbe symbioses are globally significant phenomena that  
102 dominate hydrothermal vent and hydrocarbon seep ecosystems in the deep sea. In these  
103 associations, the bacterial partner uses chemical energy from the oxidation of reduced fluid  
104 compounds, such as hydrogen, sulfide or methane, to synthesize organic matter, which serves as  
105 primary nutrition for the host (20). Vent animals harboring chemosynthetic symbionts are  
106 typically highly selective in their partner choice: In the predominant number of cases host  
107 individuals associate with only 1–2 phylotypes (species or genera) of gammaproteobacterial or  
108 campylobacterial symbionts (20), whereas symbionts can exhibit a comparatively broad host  
109 range. Chemosynthetic endosymbioses in deep-sea snails of the Indo-Pacific sister genera  
110 *Alviniconcha* and *Ifremeria* are examples of reciprocally relatively specific partnerships, where  
111 host species harbor only particular symbiont species or genera across their geographic  
112 distribution. Given the absence of host-symbiont phylogenetic concordance, the symbionts are  
113 assumed to be environmentally acquired (21), although a pseudo-vertical transmission  
114 component is possible in *Ifremeria* given its brooding reproductive mode (22). In the Eastern  
115 Lau Spreading Center (ELSC), previous work suggested that specificity to functionally distinct  
116 symbiont phylotypes drives local and regional-scale habitat partitioning among four co-occurring  
117 *Alviniconcha* and *Ifremeria* species (23–26). *Alviniconcha boucheti* from the ELSC contains a  
118 campylobacterial phylotype (Epsilon) and is usually found at northern vent sites with high  
119 concentrations of sulfide and hydrogen, while *A. kojimai* and *A. strummeri* associate with  
120 different gammaproteobacterial phylotypes (Gamma1 and Gamma1/GammaLau, respectively)  
121 and usually occupy mid-latitude to southern vent sites where the concentrations of these  
122 chemical reductants are lower (23, 25–27). *Ifremeria nautiliei* establishes dual symbioses with  
123 thiotrophic and methanotrophic gammaproteobacterial endosymbionts (27) and is co-distributed

124 with *Alviniconcha* across their geographical range, although it typically segregates into habitat  
125 patches with reduced fluid flow relative to its sister genus (28). While it has been well-  
126 established that niche differentiation across hydrothermal vents is likely mediated by symbiont  
127 phylotype specificity in *Alviniconcha* and *Ifremeria* host species, nothing is known about the  
128 fidelity of these associations at the population level, how strain-level specificity might influence  
129 host population structure and connectivity, and how regional adaptation is conferred  
130 functionally.

131 In this study we applied population genomic methods to assess symbiont strain-level  
132 genetic variation and patterns of host-symbiont genetic subdivision in *Alviniconcha* and  
133 *Ifremeria* species from the ELSC and Tonga Volcanic Arc (Fig. 1; Table 1). Using multivariate  
134 statistical analyses, we evaluated the impact of host traits, environment and geography on  
135 symbiont composition in populations of both genera and assessed the effect of local adaptation  
136 on symbiont geographic structure.

137

## 138 **Results**

### 139 *Host transcriptome assemblies and population genomic structure*

140 Host transcriptome assemblies consisted of 24,176–35,654 transcripts (totaling 20.68–28.68 Mb)  
141 and were approximately 30.30–55.40% complete (Table S1). Mapping of host reads against the  
142 transcriptome references and subsequent filtering of variant sites yielded 1,655–9,185 single  
143 nucleotide polymorphisms (SNPs) per species for population genetic analyses. Irrespective of  
144 host taxon,  $F_{ST}$  and ordination analyses revealed low genetic differentiation among host  
145 populations sampled from different vent localities (Fig. 2; Table S2). With the exception of four  
146 SNP sites in *A. kojimai*, no  $F_{ST}$  outliers could be detected in any host species (Table S3).  
147 However, all species contained a number of SNPs that were moderately to highly divergent  
148 among host populations. When analyses were constrained to these SNP subsets (*Alviniconcha*:  
149  $F_{ST} > 0.15$ ; *Ifremeria*:  $F_{ST} > 0.10$ ), population genetic structuring by vent site was observed in all  
150 *Alviniconcha* species, but not *Ifremeria* (Fig. S1). For both *A. kojimai* and *A. strummeri*, the  
151 respective SNP subsets further indicated genetic differences between Tui Malila populations that  
152 were sampled in different years. The effect of geography on host population genetic structuring  
153 was not significant after correction for symbiont genetic distance in partial Mantel correlations  
154 (Table S4).

155

156 *Symbiont genome assemblies and population genomic structure*

157 Symbiont genome assemblies varied in size from 2.10–4.86 Mb and contained 2,006–6,660  
158 predicted protein-coding genes, with GC content ranging from 34.30–59.00% (Table S2). All  
159 assemblies were characterized by a high level of completeness (92.79–99.25%) and low amount  
160 of contamination (0.74–5.48%) (Table S5). Symbiont populations for the Epsilon, Gamma1, Ifr-  
161 SOX and Ifr-MOX phylotypes were largely structured by vent field or broader geographic region  
162 based on 239–7,057 variant sites (Fig. 3, S2; Table S6). These associations were significant even  
163 when corrected for host genetic variation based on highly differentiated SNP markers (Table S4;  
164  $p \leq 0.0244$ ,  $r = 0.2665$ – $0.8705$ ). Genetic differentiation between symbiont populations typically  
165 increased with geographic distance between vent fields (Table S6). Although  $F_{ST}$  values for  
166 GammaLau populations of *A. strummeri* were moderate when calculated between distinct vent  
167 sites (Table S6), ordination analyses and Mantel tests provided no evidence for genetic  
168 differentiation of this symbiont phylotype across geographic locations based on 192 marker loci  
169 (Fig. 3, S2). The Gamma1 phylotype is associated with both *A. kojimai* and *A. strummeri* and we  
170 therefore investigated whether populations of this phylotype varied between host species.  
171 Ordination analyses indicated a clear clustering by host taxon that superseded the effect of  
172 geography (Fig. 4, S3), suggesting that different Gamma1 strains associate selectively with either  
173 *A. kojimai* or *A. strummeri*. By contrast, the effect of host genetics on symbiont genetic variation  
174 within species appeared to be weak. Although partial Mantel tests suggested significant  
175 associations of host genotype with strain composition or dominant symbiont type for the *A.*  
176 *boucheti* – Epsilon, *A. kojimai* – Gamma1, *A. strummeri* – Gamma1, and *I. nautiliei* – Ifr-SOX  
177 pairs,  $r$  statistics were relatively low especially compared to the effect of geography, indicating  
178 limited biological relevance (Table S4;  $p \leq 0.0364$ ,  $r = 0.0510$ – $0.2270$ ).

179

180 *Gene content variation between symbiont strains*

181 We assessed variation in gene content between symbiont strains from different vent localities or  
182 broader geographic regions (Fig. 5, S4; Table S7). For the Gamma1 symbiont, we further  
183 determined gene content variation between strains from different host species given that this  
184 symbiont phylotype occurs in both *A. strummeri* and *A. kojimai* (Fig. 4, S3; Table S8).  
185 Differentially preserved or abundant genes between symbiont strains comprised about 1–5% of

186 protein-coding regions. Independent of symbiont phylotype, the most common differences  
187 among geographic or host-specific strains concerned genes of unknown function as well as a  
188 smaller number of genes related to mobilome and anti-viral defense (Fig. 4–5, S3–4; Table S7,  
189 S8). Geographic strains of the *A. boucheti* Epsilon symbiont further differed in the presence of an  
190 ABC transporter, a GDP-L-fucose synthetase, a NAD(FAD)-utilizing hydrogenase and the DNA  
191 repair protein RecN, which were conserved in strains from Kilo Moana and Tow Cam but were  
192 absent or very lowly abundant in strains from ABE (Table S7). Within the *A. kojimai* Gamma1  
193 phylotype, strains from ABE (but rarely Tui Malila) contained a few genes involved in DNA,  
194 protein and cell wall metabolism as well as maturation and regulation of uptake (NiFe)  
195 hydrogenases (*hyaC*, *hyaD*, *hoxJ*). Differences in hydrogenase-related genes were also observed  
196 in the Gamma1 symbiont of *A. strummeri*, where an operon for a hydrogen-sensing hydrogenase  
197 (*hupUV/hoxBC*) and genes for hydrogenase maturation and assembly proteins (*hypF*, *hyaF*,  
198 *hoxV/hupK*, *hypD*, *hypE*, *hoxX*) were largely missing in strains from Tui Malila (but not Tahī  
199 Moana) (Table S7). Between host species, Gamma1 strains notably differed in the presence of  
200 genes for a sulfite dehydrogenase complex (*soeABC*), which was abundant in strains specific to  
201 *A. kojimai* but not *A. strummeri* (Table S8). Within the *A. strummeri* GammaLau phylotype,  
202 strains from Tui Malila contained a broad range of metabolic genes that were absent or  
203 infrequent in strains from Tahī Moana, including genes related to macronutrient metabolism,  
204 stress response, membrane transport and several other functional processes (Table S7). The Ifr-  
205 SOX strains of *I. nautiliei* differed in several genes related to DNA, nitrogen, lipid and amino  
206 acid metabolism, membrane transport, cell regulation and detoxification, which were present in  
207 strains from the ELSC but mostly missing in strains from Niua South. Within the Ifr-MOX  
208 phylotype, strains from Tahī Moana and Tui Malila differed in genes involved in sulfide  
209 respiration and oxidative phosphorylation, macronutrient metabolism, cation transport, motility,  
210 cofactor, cell wall, DNA and nucleotide metabolism as well as cell regulation and stress response  
211 (Table S7).

212

### 213 *Adaptive variation within symbiont phylotypes*

214 A subset of genetic variants exhibited significant associations with environmental factors in all  
215 symbiont phylotypes except for GammaLau, with constrained ordinations explaining between  
216 5.39% and 19.76% of the variance in the respective RDA models (Fig. 6; Table S9). Candidate

217 adaptive loci for each symbiont phylotype encompassed a variety of metabolic categories,  
218 although in many cases no particular function could be assigned (Table S9). In the *A. boucheti*  
219 Epsilon symbiont, 129 variants were significantly associated with fluid composition, while  
220 another 47 were correlated with depth. These variants were mostly located in genes related to  
221 protein, amino acid, and cell wall metabolism, followed by cofactor, DNA, carbon and  
222 nucleotide metabolism, as well as membrane transport (Table S9). Several other variants were  
223 linked to nitrogen, iron and RNA metabolism, virulence, motility, cell signaling, stress response,  
224 respiration, cell cycle, as well as hydrogen and sulfur metabolism. In the *A. kojimai* Gamma1  
225 symbiont, 91 variants were correlated with fluid composition and 9 were linked to year. 29 of  
226 these variants were classified into functional categories. The most represented categories were  
227 mobilome, cell wall and DNA metabolism, anti-viral defense, membrane transport, cofactor  
228 metabolism and respiration. A few variants were associated with amino acid, hydrogen, protein  
229 and RNA metabolism, and cell regulation. In the *A. strummeri* Gamma1 symbiont, 95 variants  
230 showed associations with fluid composition, while 3 were correlated with year. 54 of these  
231 variants could be functionally annotated and assigned to the following metabolic categories:  
232 protein, amino acid and cell wall metabolism, membrane transport, virulence, carbon, nitrogen,  
233 DNA/RNA and nucleoside metabolism, cofactor, fatty acid and sulfur metabolism, stress  
234 response, cell signaling and mobilome (Table S9). The *I. nautiliei* Ifr-SOX and Ifr-MOX  
235 symbionts contained 94 and 11 putatively adaptive variants, respectively. In both symbionts,  
236 these variants were mostly linked to depth, followed by fluid composition and year. While the  
237 majority of variants were located in genes with unknown functions, a number of loci was linked  
238 to mobile elements, cell cycle, anti-viral defense, DNA/RNA metabolism, and membrane  
239 transport. In each symbiont phylotype, virtually all candidate variants were characterized by  
240 elevated  $F_{ST}$  and gene-wide  $pN/pS$  values, further supporting their potential role in habitat  
241 adaptation (Table S9). Several other genes exhibited increased ratios of non-synonymous to  
242 synonymous substitution, although sites within these genes did not show significant associations  
243 with environment (Table S10). It is possible that sites within these genes covary with other  
244 ecological factors that could not be tested in this study or that these patterns are caused by recent  
245 slightly deleterious mutations that were not yet purged by natural selection.

246

## 247 **Discussion**



248 Strain-level variation within microbial symbionts is increasingly recognized as an important  
249 driver of host ecology and evolution (6), yet its patterns, determining factors and functional  
250 implications remain poorly investigated in many non-model symbioses. In this study, we used  
251 metagenomic analyses to assess sequence and gene content differences between chemosynthetic  
252 symbionts associated with four co-occurring species of deep-sea hydrothermal vent snails and  
253 determined the impact of host genetic, geographical and environmental factors on symbiont  
254 strain composition and variation.

255         Despite fidelity between hosts and symbionts at the species level (23, 25), our results  
256 indicate that specificity between host genotypes and symbiont strains in *Alviniconcha* and  
257 *Ifremeria* is weak: Host populations were not partitioned across a ~800 km gradient, whereas  
258 symbiont populations were clearly structured between vent locations or broader geographic  
259 regions. Even when we correlated symbiont and host genetic distances based on highly  
260 differentiated markers, test statistics for significant associations remained low, suggesting that  
261 host genetics has a minor impact compared to environment or geography on strain composition  
262 within both *Alviniconcha* and *Ifremeria*.

263         These findings qualitatively agree with observations in deep-sea mussel hybrids that  
264 appear to associate with locally available symbiont strains (19), but contrast markedly with  
265 patterns in other horizontally transmitted partnerships, such as the squid-*Vibrio* symbiosis and  
266 some legume-rhizobia associations, where hosts exhibit strong strain specificity (6).  
267 Environmental uptake of locally adapted symbiont strains provides host organisms with the  
268 opportunity to optimally exploit novel habitats, but carries the risk of unsuccessful symbiont  
269 acquisition and infection by cheaters (3). Depending on the amount of partner reliance, chances  
270 of symbiont encounter and fitness variation among symbiont strains, holobionts likely find  
271 different tradeoffs between these opposing factors. Associations with chemosynthetic bacteria  
272 are obligate for hydrothermal vent animals, but are restricted to relatively ephemeral habitats that  
273 are characterized by large temporal and spatial fluctuations in environmental conditions and  
274 associated shifts in microbial communities (29–31). Strong nutritional dependency in vent  
275 symbioses combined with the uncertainty of habitat (and thus symbiont) encounter might  
276 promote specificity towards a mutualistic symbiont phylotype, while enabling enough flexibility  
277 towards different local strains of that phylotype to maximize recruitment success of host larvae at  
278 a new vent site. By contrast, bobtail squids inoculate their environment with symbiotic bacteria

279 and thereby ensure symbiont availability for their offspring (32), which might favor increased  
280 strain selectivity in this association. Similarly, some legume species appear to preferentially  
281 associate with certain rhizobial strains that are abundant in the native host range (33). Although  
282 the factors underlying strain specificity are not fully understood, it is possible that the relative  
283 fitness advantages provided by these locally available strains (33) coupled with the benefit of  
284 decreased cheater invasion (11) might have selected for strong partner fidelity in these  
285 symbioses.

286 *Alviniconcha kojimai* and *A. strummeri* represent notable exceptions to the observed  
287 patterns, as they share identical phylotypes of one gammaproteobacterial symbiont (Gamma1),  
288 but appear to take up different strains even in habitats where these host species co-occur. The  
289 phylogenetic divergence between *A. kojimai* and *A. strummeri* (~25 MYA) is more recent than  
290 that between either species and *A. boucheti* (~38 MYA) or *I. nautiliei* (~113 MYA) (25). Perhaps  
291 the closer evolutionary relationship between these two species favors associations with the same  
292 symbiont phylotype, as has been suggested for *Bathymodiolus azoricus* and *B. puteoserpentis* on  
293 the Mid-Atlantic Ridge as well as *B. thermophilus* and *B. antarcticus* on the East Pacific Rise  
294 (19). However, compared to the bathymodiolin mussel system, the split between *A. kojimai* and  
295 *A. strummeri* is significantly older (>17 MYR), which could indicate that the timing of phylotype  
296 specificity evolution varies among taxonomic groups, possibly as a result of contrasting  
297 ecological or evolutionary contexts. The fact that *A. kojimai* and *A. strummeri* nevertheless  
298 associate with distinct symbiont strains in sympatry is potentially a mechanism to avoid  
299 competition for niche space. Gamma1 strains of these two species notably differed in the  
300 presence of a molybdenum-containing sulfite dehydrogenase (SoeABC), which was preserved in  
301 strains of *A. kojimai* but not *A. strummeri*. SoeABC is the predominant enzyme for sulfite  
302 oxidation in many purple sulfur bacteria (34) and is further involved in taurine and  
303 dimethylsulfoniopropionate degradation in *Roseobacter* clade bacteria (35–37). Although the  
304 physiological role of SoeABC in *A. kojimai*'s Gamma1 strain is unknown, it is possible that it  
305 contributes to partitioning of sulfur resources among co-occurring snail holobionts.

306 Our data support a model of horizontal symbiont transmission in both *Alviniconcha* and  
307 *Ifremeria*. While these results are expected for *Alviniconcha* which produce free-swimming  
308 planktotrophic larvae and do not invest in their young (38), they are rather surprising for  
309 *Ifremeria* which brood their offspring in a modified pouch in the female's foot (22) and would

310 thus have the opportunity to pseudo-vertically transmit their symbionts. It is possible that a  
311 pseudo-vertical transmission component exists in *Ifremeria*, but that maternally acquired  
312 symbionts get replaced or complemented by more competitive strains in the habitat where the  
313 snail larvae settle. Our current dataset cannot distinguish this possibility from a strict horizontal  
314 transmission mode, though future studies assessing symbiont composition in different  
315 developmental stages of *Ifremeria* would be helpful to address this hypothesis.

316 While the majority of genetic variants in the symbionts did not deviate from neutral  
317 expectations, a subset of loci showed evidence for natural selection, implying a role of both  
318 genetic drift and local adaptation in shaping symbiont population structure. Candidate adaptive  
319 loci spanned a surprisingly broad range of metabolic functions, many of which were probably  
320 not causally linked to the investigated environmental predictors but other correlated variables  
321 that we could not account for in this study. For example, in almost all symbiont phylotypes we  
322 observed adaptive variation in genes that were related to anti-viral defense (e.g., CRISPR-  
323 associated proteins, restriction-modification systems) or mobile elements. Although differences  
324 in depth or geochemistry might contribute to these patterns, it is more likely that they reflect  
325 exposure of symbiont strains to distinct viral assemblages that might covary with local habitat  
326 conditions, as has been suggested for vestimentiferan tubeworm symbionts (39). Polymorphisms  
327 in other genes, by contrast, are likely directly explained by variation in the analyzed  
328 environmental factors. Geographic strains of *A. boucheti*'s Epsilon symbiont, for instance,  
329 contained several variants under positive selection that were located in genes involved in  
330 hydrogenase assembly, iron transport, sulfur oxidation and respiration. Likewise, the Gamma1  
331 strains of *A. kojimai* and *A. strummeri* showed adaptive differences in variants related to  
332 hydrogen and sulfur metabolism, respectively. Niche-specific differences in hydrogen metabolic  
333 genes were also observed in comparisons of gene content among symbiont strains. In both *A.*  
334 *kojimai* and *A. strummeri*, Gamma1 strains from Tui Malila lacked some subunits of uptake or  
335 hydrogen-sensing hydrogenases as well as various genes for hydrogenase maturation, synthesis  
336 and regulation. Given that H<sub>2</sub> concentrations at Tui Malila can drop to 35 μM in endmember  
337 fluids and are probably lower in diffuse flow habitats (23), it is possible that hydrogen does not  
338 constitute a major energy source for Gamma1 strains from this locality. This hypothesis is in  
339 agreement with previous physiological experiments that revealed strikingly low hydrogen  
340 oxidation and associated carbon fixation rates in Gamma1 symbionts from Tui Malila (26). An

341 alternative though mutually non-exclusive explanation for the loss of hydrogenase-related genes  
342 at least in the *A. strummeri* strain from Tui Malila could be avoidance of intra-host competition  
343 with co-occurring GammaLau strains, which often co-dominate in *A. strummeri* individuals at  
344 this vent site (23). Such functional diversity is predicted to enable symbiont coexistence in a  
345 variety of hydrothermal vent symbioses, including bathymodiolin mussels (40, 41), alvinocaridid  
346 shrimp (42) and vestimentiferan tubeworms (43).

347         Compared to their symbionts, host populations were markedly less structured across the  
348 same spatial scales. Although a proportion of genetic markers was differentiated across vent  
349 sites, we did not find strong evidence for local adaptation in any host species, suggesting that  
350 these patterns likely reflect random variation among localities. The limited genetic subdivision  
351 between host populations agrees with predictions from biophysical models that indicate absence  
352 of physical dispersal barriers for vent larvae within the Lau Back-Arc Basin (44). While  
353 symbiont population structure, by contrast, appeared to be at least partly driven by natural  
354 selection, it is possible that symbionts also experience stronger dispersal limitations than their  
355 hosts, as has been hypothesized in some coral-algae symbioses (18). The environmental  
356 distributions and life cycles of the free-living stages of *Alviniconcha* and *Ifremeria* symbionts are  
357 currently unknown and a better understanding of these aspects will be necessary to evaluate the  
358 relative importance of dispersal barriers on symbiont biogeography.

359         Overall, our findings reveal a lack of strain-level specificity in *Alviniconcha* and  
360 *Ifremeria* symbioses, which possibly reflects an evolutionary strategy to cope with the transient  
361 and dynamic nature of hydrothermal vent habitats. Strain flexibility in these associations likely  
362 contributes to the wide-spread genetic connectivity observed among host populations, which in  
363 turn could favor ecological resilience to natural but also anthropogenic environmental  
364 disturbances, a relevant consideration given the increasing human pressures on hydrothermal  
365 ecosystems worldwide (45). Our observations further support the fundamental hypothesis that  
366 horizontal transmission in marine symbioses enables host organisms to associate with locally  
367 adapted symbiont strains (3, 12–14). Though the genomic basis of local adaptation can be  
368 detected in natural populations using population genomics methods, as we did here, evaluation of  
369 the phenotypic consequences of the observed strain-level genomic trait variation will be  
370 necessary to confirm local adaptation in these symbiont strains. Future work using organism-  
371 based manipulative experiments will be helpful to compare the fitness of hydrothermal vent

372 animals hosting site-specific symbiont strains when exposed to native and foreign conditions  
373 (46). These assessments will be critical to understand the commonality of horizontal symbiont  
374 transmission in the marine environment, given the hypothesis that local adaptation is less  
375 common in marine than terrestrial systems due to higher levels of gene flow (47).

376

## 377 **Materials and Methods**

### 378 *Sample collection, nucleic acid extraction and sequencing*

379 Samples of *Alviniconcha* and *Ifremeria* were collected from six vent sites (1164–2722 m) of the  
380 Lau Basin and Tonga Volcanic Arc in 2009 and 2016 using remotely operated vehicles (Fig. 1;  
381 Table 1). Upon recovery, animal samples were dissected, placed in RNALater™ Stabilization  
382 Solution (Thermo Fisher Scientific, Inc.) and frozen at –80°C until further analysis. DNA was  
383 extracted with the Quick-DNA 96 Plus extraction kit (Zymo Research, Inc.) and further purified  
384 with the MO BIO PowerClean DNA Pro Clean-Up kit (Qiagen, Inc.). High molecular weight  
385 (HMW) DNA for long-read sequencing was isolated with Qiagen Genomic-tips following  
386 manufacturer’s instructions.

387

### 388 *Host transcriptome sequencing and assembly*

389 Illumina RNAseq reads for host transcriptome assemblies were obtained from sequencing  
390 experiments performed in (48) and (26). Adapter clipping, quality trimming, and removal of  
391 rRNA and symbiont reads was performed as in (26). Cleaned host reads were error corrected  
392 with Rcorrector (49) and filtered for uncorrectable and overrepresented sequences with the  
393 TRANSCRIPTOMEASSEMBLYTOOLS package  
394 (<https://github.com/harvardinformatics/TranscriptomeAssemblyTools>). Host transcriptome co-  
395 assemblies for each *Alviniconcha* and *Ifremeria* species were performed with TRINITY (50) using  
396 the PASAFLY algorithm. For each *Alviniconcha* species, additional transcripts were reconstructed  
397 from 454 reads obtained from (51). Assembled contigs for each species were clustered with CD-  
398 HIT-EST (52) at a 95% identity threshold to reduce transcript redundancies. Open reading frames  
399 (ORFs) were predicted with TRANSDecoder (<https://github.com/TransDecoder/TransDecoder>)  
400 considering homologies to known proteins (UniRef90) and protein domains (Pfam) as ORF  
401 retention criteria. Transcripts that did not contain any ORF or had a non-eukaryotic origin based

402 on taxonomy classifications with BLOBTOOLS (53) were removed from the assembly. Final  
403 transcriptome assemblies were evaluated for quality and completeness with BUSCO (54).

404

#### 405 *Symbiont genome sequencing and re-assembly*

406 Illumina reads for the *A. boucheti*, *A. kojimai* and *Ifremeria* holobionts were obtained from  
407 previous sequencing runs performed in (27). Raw reads were trimmed with TRIMMOMATIC (55)  
408 and filtered for sequence contaminants through mapping against the human (GRCh38) and PhiX  
409 reference genomes. Decontaminated reads were grouped into symbiont and host reads by  
410 assessing best matches against draft symbiont genomes (27) with BBSPLIT  
411 (<https://sourceforge.net/projects/bbmap/>). To improve contiguity of the genome assemblies we  
412 conducted 3–4 Nanopore sequencing runs for each symbiont phylotype on a MinION device  
413 (Oxford Nanopore Technologies) using the SQK-LSK109 ligation kit after HMW DNA  
414 enrichment with the Circulomics Short Read Eliminator kit. Basecalling of the Nanopore reads  
415 was done with ALBACORE (Oxford Nanopore Technologies) and adapters were clipped with  
416 PORECHOP (<https://github.com/rrwick/Porechop>). Hybrid assemblies of Illumina and Nanopore  
417 reads were constructed for each symbiont genome with SPADES (Gamma1) (56) or  
418 METASPADES (all others) (57) choosing k-mers between 21 and 91 in 10 step increments. Raw  
419 assemblies for the Epsilon, Gamma1 and Ifr-SOX symbionts were binned with GBTOOLS (58)  
420 and incrementally gap filled, corrected and scaffolded with LR\_GAPCLOSER (59), ra2.py (60),  
421 and SLR (61), respectively, following recommendations by (62) The Ifr-MOX symbiont  
422 assembly was automatically binned with METABAT2 (63) for contigs  $\geq 1500$  bp. Shorter contigs  
423 ( $\geq 500$  bp) were binned with MAXBIN (64). Scaffolds  $< 200$  bp were excluded from all  
424 assemblies. Final assemblies were polished with PILON (65), functionally annotated with RAST-  
425 TK (66) and quality-checked with CHECKM (67) and QUAST (68).

426

#### 427 *Population-level metagenomic sequencing and variant identification in hosts and symbionts*

428 192 barcoded high-throughput DNA sequencing libraries were prepared with a Tn5 transposase-  
429 based protocol after (69) at the University of California Santa Cruz and then sent for 150 bp  
430 paired-end sequencing on a NovaSeq 6000 instrument at the University of California Davis.  
431 However, due to low read allocation 66 of the libraries were excluded from further analysis. Raw  
432 sequence reads were trimmed, filtered and sorted by host species and symbiont phylotype as

433 described above. Optical duplicates were removed with PICARD's MARKDUPLICATES tool  
434 (<https://github.com/broadinstitute/picard>). To resolve common alignment errors and improve  
435 base call accuracy, we locally realigned reads around indels and recalibrated base quality scores  
436 with LOFREQ (70).

437 Host population genomic variation was assessed in ANGSD (71) by inferring genotype  
438 likelihoods based on Hardy-Weinberg equilibrium considering individual inbreeding  
439 coefficients. To increase accuracy of the analyses, variant sites with mapping qualities < 30  
440 (minMapQ = 30), base qualities < 20 (minQ = 20), and minimum minor allele frequencies < 0.01  
441 (minMaf = 0.01) were excluded. We further filtered sites based on strand bias (sb\_pval = 0.05),  
442 heterozygote bias (hetbias\_pval = 0.05) and probability of being variable (SNP\_pval = 1e-6). In  
443 addition, we removed spurious and improperly paired reads, adjusted mapping qualities for  
444 excessive mismatches (C = 50) and computed per-base alignment qualities (BAQ = 1) to  
445 disregard variants close to indel regions. Putative paralogous variants were excluded by  
446 discarding reads with multiple mappings and by considering only sites that had a maximum  
447 depth of 40–80. Genetic distances between individuals were inferred by calculating pairwise  
448 covariance matrices.

449 Symbiont population genomic variation was determined with FREEBAYES (72) using  
450 input parameters adjusted for the analysis of metagenomic data (-F 0.01 -C 1 -p 1 --pooled-  
451 continuous --haplotype-length 0 --report-monomorphic). Variant calls were restricted to sites  
452 with a minimum base quality of 20, a minimum mapping quality of 30, and a minimum coverage  
453 of 10. To eliminate bias in variant identification and other downstream analyses due to uneven  
454 read depth between samples, we normalized all samples to the lowest amount of coverage found  
455 in a sample for a particular symbiont phylotype (> 10X coverage). Variants were further filtered  
456 based on strand bias (SRP > 5 && SAP > 5 && EPP > 5), proximity to indels (5 bp) and  
457 maximum mean depth with BCFTOOLS (73) and VCFTOOLS (74). In addition, sites and  
458 individuals with more than 25% missing data were excluded from the analysis. Allele counts (=   
459 symbiont strain abundances) and consensus haplotypes (= dominant symbiont strains) were  
460 extracted with GATK's VARIANTSOTABLE tool (75).

461

462 *Genomic structure and differentiation*

463 We performed ordination analyses with the APE and STATS packages in R (76, 77) to assess  
464 genetic variation between symbiont and host populations. Host genetic structure was determined  
465 through principal component analyses based on genetic covariance matrices, while symbiont  
466 genetic structure was inferred through principal coordinate analyses based on both consensus  
467 haplotype and allele count data transformed into Euclidean distances and Bray-Curtis  
468 dissimilarities, respectively. For each sample, absolute allele counts were normalized to relative  
469 counts prior to analysis. Negative eigenvalues were corrected using the method by Cailliez (78)  
470 and final ordination plots were produced with GGLOT2 (79).  $F_{ST}$  values between host and  
471 symbiont populations were calculated in ANGSD and SCIKIT-ALLEL  
472 (<https://github.com/cggh/scikit-allel>), respectively, following the procedure in (80). For the host  
473 species, potential outlier loci under selective pressures were inferred with OUTFLANK (81) based  
474 on neutral  $F_{ST}$  distributions that were obtained from quasi-independent SNP subsets determined  
475 with PLINK (82).

476

#### 477 *Assessment of gene content variation*

478 We used PANPHLAN (83) to investigate potential differences in gene composition between  
479 symbiont strains from different vent localities. Downsampled symbiont reads for each species  
480 were mapped against the corresponding symbiont reference genome using custom RAST-TK  
481 annotations for functional categorizations. Samples were profiled for gene presence/absence  
482 based on the following parameter thresholds: --min\_coverage 1 --left\_max 1.70 --right\_min 0.30.  
483 Gene content variation between symbiont strains was assessed by identifying genes that were  
484 present/absent in 90% of samples from one or the other geographic region. To account for gene  
485 content variation between different strains within hosts we further quantified gene abundances  
486 with SALMON (84) using the following parameters: -I IU --meta --rangeFactorizationBins 4 --  
487 numBootstraps 1000 --seqBias --gcBias -s -u. Abundance values were normalized with the  
488 Trimmed Mean of M method using TRINITY's *abundance\_estimates\_to\_matrix.pl* script (50, 85).  
489 Gene presence/absence and differential abundance heatmaps were produced with the  
490 COMPLEXHEATMAP package in R (86).

491

#### 492 *Assessment of symbiont variation based on environment and host genetics*



493 We conducted partial Mantel tests with the VEGAN package in R (87) to assess relationships  
494 between host and symbiont genetic distances and geography based on Spearman rank  
495 correlations. As no population genetic structure could be observed in any host species based on  
496 the full SNP datasets, we estimated host covariance matrices using only moderately to highly  
497 differentiated SNP subsets for this analysis (*Alviniconcha*:  $F_{ST} > 0.15$ ; *Ifremeria*:  $F_{ST} > 0.10$ ).  
498 Geographic distances were determined by calculating the geodesics between vent sites with the  
499 GEOSPHERE package (88). We used redundancy analyses (RDA) following the approach in (89)  
500 to evaluate the influence of hydrothermal fluid composition and depth on the genetic structure of  
501 each symbiont phylotype. We further included the effect of sampling year, which encompasses  
502 changes in hydrothermal circulation within the ELSC as indicated by the cessation in fluid flow  
503 at the Kilo Moana vent field between 2009 and 2016. Endmember concentrations for  
504 geochemical compounds were obtained from the literature (23, 90, 91) or unpublished data  
505 provided by A. Diehl and J. Seewald (Table 1). Due to multi-collinearity among the chemical  
506 species, we used the first eigenvector from principal coordinate analyses (corresponding to the  
507 eigenvalue with the largest explanatory power) as composite value. For each symbiont  
508 phylotype, we further assessed the strength of correlation with other predictors to exclude  
509 variables that were highly collinear. Unless geographic location was strongly linked to  
510 environmental predictors, we used latitude as a conditioning factor in the analyses to correct for  
511 isolation by distance. Based on these collinearity evaluations, we tested the effect of all factors  
512 on the two *Ifremeria* symbionts, the effect of depth and fluid composition on the *A. boucheti*  
513 symbiont and the effect of fluid composition and year (uncorrected for geography) on the *A.*  
514 *kojimai* and *A. strummeri* symbionts. SNPs were considered candidates for local adaptation if  
515 their loadings on significant constrained RDA axes deviated more than 2.5 standard deviations  
516 from the mean of the distribution. For each symbiont phylotype we further calculated the ratio of  
517 non-synonymous to synonymous polymorphisms ( $pN/pS$ ) with SNPEFF (92) to infer candidate  
518 genes evolving under natural selection.

519

#### 520 *Data Accessibility*

521 Raw Nanopore reads, host transcriptomes and symbiont genomes have been deposited in the  
522 National Center for Biotechnology Information under BioProjects PRJNA523619,  
523 PRJNA526236 and PRJNA741492. Annotations for new symbiont genomes are available on the

524 RAST webserver (<https://rast.nmpdr.org/rast.cgi>) through the guest access (login: guest,  
525 password: guest) under job IDs 6666666.685764 (Epsilon), 6666666.685765 (Ifr-SOX),  
526 6666666.686795 (Gamma1), and 6666666.687466 (Ifr-MOX). Scripts for bioinformatic analyses  
527 are available on GitHub under [https://github.com/cbreusing/Provannid\\_host-symbiont\\_popgen](https://github.com/cbreusing/Provannid_host-symbiont_popgen).

528

## 529 **Acknowledgements**

530 We thank the captains, crews and ROV pilots of the R/V *Thomas G. Thompson* (ROV *Jason II*)  
531 and R/V *Falkor* (ROV *Ropos*) for supporting the sample collections that made this study  
532 possible. We thank Peter Girguis for his contribution of the 2009 samples to this project,  
533 Alexander Diehl and Jeff Seewald for providing geochemical data, Michelle Hauer and Erin  
534 Frates for their assistance with sample preparation and the National Science Foundation EPSCoR  
535 Cooperative Agreement OIA-#1655221 for providing access to Brown University's high-  
536 performance computing cluster where the bioinformatic analyses were performed. We further  
537 thank the technical staff at the UC Davis Genome Center for sequencing our Illumina  
538 metagenomic libraries. This work was supported by the National Science Foundation (grant  
539 numbers OCE-1536331, 1819530 and 1736932 to R.A.B.) and the National Institute of Health  
540 (grant numbers 5K99GM135583-02 to S.L.R. and 5R35GM128932-03 to R.C.D.).

541

## 542 **References**

- 543 1. R. M. Fisher, L. M. Henry, C. K. Cornwallis, E. T. Kiers, S. A. West, The evolution of  
544 host-symbiont dependence. *Nat. Commun.* **8**, 15973 (2017).
- 545 2. S. L. Russell, Transmission mode is associated with environment type and taxa across  
546 bacteria-eukaryote symbioses: a systematic review and meta-analysis. *FEMS Microbiol.*  
547 *Lett.* **366**, fnz013 (2019).
- 548 3. R. C. Vrijenhoek, "Genetics and evolution of deep-sea chemosynthetic bacteria and their  
549 invertebrate hosts" in *The Vent and Seep Biota: Aspects from Microbes to Ecosystems*, S.  
550 Kiel, Ed. (Springer, Dordrecht, Netherlands, 2010), pp. 15–49.
- 551 4. M. Bright, S. Bulgheresi, A complex journey: transmission of microbial symbionts. *Nat.*  
552 *Rev. Microbiol.* **8**, 218–230 (2010).
- 553 5. G. Chomicki, E. T. Kiers, S. S. Renner, The evolution of mutualistic dependence. *Annu.*  
554 *Rev. Ecol. Evol. Syst.* **51**, 409–432 (2020).
- 555 6. D. R. Ginete, H. Goodrich-Blair, From binary model systems to the human microbiome:  
556 factors that drive strain specificity in host-symbiont associations. *Front. Ecol. Evol.* **9**,  
557 614197 (2021).
- 558 7. S. C. Verma, T. Miyashiro, Quorum sensing in the squid-*Vibrio* symbiosis. *Int. J. Mol. Sci.*  
559 **14**, 16386–16401 (2013).

- 560 8. S. L. Jackrel, J. W. Yang, K. C. Schmidt, V. J. Denef, Host specificity of microbiome  
561 assembly and its fitness effects in phytoplankton. *ISME J.* **15**, 774–788 (2021).
- 562 9. Q. Wang, J. Liu, H. Zhu, Genetic and molecular mechanisms underlying symbiotic  
563 specificity in legume-*Rhizobium* interactions. *Front. Plant Sci.* **9**, 313 (2018).
- 564 10. B. B. Allito, N. Ewusi-Mensah, V. Logah, Legume-*Rhizobium* strain specificity enhances  
565 nutrition and nitrogen fixation in faba bean (*Vicia faba* L.). *Agronomy* **10**, 826 (2020).
- 566 11. L. Walker, B. Lagunas, M. L. Gifford, Determinants of host range specificity in legume-  
567 rhizobia symbiosis. *Front. Microbiol.* **11**, 585749 (2020).
- 568 12. D. C. Smith, A. E. Douglas, *The Biology of Symbiosis*, E. Arnold, Ed. (Cambridge  
569 University Press, 1987).
- 570 13. A. Hilário, *et al.*, New perspectives on the ecology and evolution of siboglinid tubeworms.  
571 *PLoS ONE* **6**, e16309 (2011).
- 572 14. D. J. Thornhill, E. J. Howells, D. C. Wham, T. D. Steury, S. R. Santos, Population genetics  
573 of reef coral endosymbionts (*Symbiodinium*, Dinophyceae). *Mol. Ecol.* **26**, 2640–2659  
574 (2017).
- 575 15. R. C. Vrijenhoek, M. Duhaime, W. J. Jones, Subtype variation among bacterial  
576 endosymbionts of tubeworms (Annelida: Siboglinidae) from the Gulf of California. *Biol.*  
577 *Bull.* **212**, 180–184 (2007).
- 578 16. D. T. Pettay, T. C. LaJeunesse, Long-range dispersal and high-latitude environments  
579 influence the population structure of a “stress-tolerant” dinoflagellate endosymbiont. *PLoS*  
580 *ONE* **8**, e79208 (2013).
- 581 17. P.-T. Ho, *et al.*, Geographical structure of endosymbiotic bacteria hosted by *Bathymodiolus*  
582 mussels at eastern Pacific hydrothermal vents. *BMC Evol. Biol.* **17**, 121 (2017).
- 583 18. S. W. Davies, K. N. Moreland, D. C. Wham, M. R. Kanke, M. V. Matz, *Cladocopium*  
584 community divergence in two *Acropora* coral hosts across multiple spatial scales. *Mol.*  
585 *Ecol.* **29**, 4559–4572 (2020).
- 586 19. M. Ücker, *et al.*, Deep-sea mussels from a hybrid zone on the Mid-Atlantic Ridge host  
587 genetically indistinguishable symbionts. *ISME J.* (2021) [https://doi.org/10.1038/s41396-](https://doi.org/10.1038/s41396-021-00927-9)  
588 [021-00927-9](https://doi.org/10.1038/s41396-021-00927-9) (accessed August 11, 2021).
- 589 20. N. Dubilier, C. Bergin, C. Lott, Symbiotic diversity in marine animals: the art of  
590 harnessing chemosynthesis. *Nat. Rev. Microbiol.* **6**, 725–740 (2008).
- 591 21. Y. Suzuki, *et al.*, Host-symbiont relationships in hydrothermal vent gastropods of the  
592 genus *Alviniconcha* from the Southwest Pacific. *Appl. Environ. Microbiol.* **72**, 1388–1393  
593 (2006).
- 594 22. K. C. Reynolds, *et al.*, New molluscan larval form: Brooding and development in a  
595 hydrothermal vent gastropod, *Ifremeria nautilei* (Provannidae). *Biol. Bull.* **219**, 7–11  
596 (2010).
- 597 23. R. A. Beinart, *et al.*, Evidence for the role of endosymbionts in regional-scale habitat  
598 partitioning by hydrothermal vent symbioses. *Proc. Natl. Acad. Sci. USA* **109**, E3241–  
599 E3250 (2012).
- 600 24. R. A. Beinart, A. Gartman, J. G. Sanders, G. W. Luther, P. R. Girguis, The uptake and  
601 excretion of partially oxidized sulfur expands the repertoire of energy resources  
602 metabolized by hydrothermal vent symbioses. *Proc. R. Soc. B.* **282**, 20142811 (2015).
- 603 25. C. Breusing, *et al.*, Allopatric and sympatric drivers of speciation in *Alviniconcha*  
604 hydrothermal vent snails. *Mol. Biol. Evol.* **37**, 3469–3484 (2020).

- 605 26. C. Breusing, *et al.*, Physiological dynamics of chemosynthetic symbionts in hydrothermal  
606 vent snails. *ISME J.* **14**, 2568–2579 (2020).
- 607 27. R. A. Beinart, C. Luo, K. T. Konstantinidis, F. J. Stewart, P. R. Girguis, The bacterial  
608 symbionts of closely related hydrothermal vent snails with distinct geochemical habitats  
609 show broad similarity in chemoautotrophic gene content. *Front. Microbiol.* **10**, 1818  
610 (2019).
- 611 28. E. Podowski, S. Ma, G. Luther, D. Wardrop, C. Fisher, Biotic and abiotic factors affecting  
612 distributions of megafauna in diffuse flow on andesite and basalt along the Eastern Lau  
613 Spreading Center, Tonga. *Mar. Ecol. Prog. Ser.* **418**, 25–45 (2010).
- 614 29. M. Tivey, Generation of seafloor hydrothermal vent fluids and associated mineral deposits.  
615 *Oceanography* **20**, 50–65 (2007).
- 616 30. G. J. Dick, *et al.*, The microbiology of deep-sea hydrothermal vent plumes: ecological and  
617 biogeographic linkages to seafloor and water column habitats. *Front. Microbiol.* **4**, 124  
618 (2013).
- 619 31. G. J. Dick, The microbiomes of deep-sea hydrothermal vents: distributed globally, shaped  
620 locally. *Nat. Rev. Microbiol.* **17**, 271–283 (2019).
- 621 32. S. V. Nyholm, M. McFall-Ngai, The winnowing: establishing the squid–*Vibrio* symbiosis.  
622 *Nat. Rev. Microbiol.* **2**, 632–642 (2004).
- 623 33. M. Andrews, M. E. Andrews, Specificity in legume-rhizobia symbioses. *Int. J. Mol. Sci.*  
624 **18**, 705 (2017).
- 625 34. C. Dahl, B. Franz, D. Hensen, A. Kesselheim, R. Zigann, Sulfite oxidation in the purple  
626 sulfur bacterium *Allochromatium vinosum*: identification of SoeABC as a major player and  
627 relevance of SoxYZ in the process. *Microbiology* **159**, 2626–2638 (2013).
- 628 35. J. M. Rinta-Kanto, *et al.*, Analysis of sulfur-related transcription by *Roseobacter*  
629 communities using a taxon-specific functional gene microarray. *Environ. Microbiol.* **13**,  
630 453–467 (2011).
- 631 36. S. Lehmann, A. W. Johnston, A. R. Curson, J. D. Todd, A. M. Cook, “SoeABC, a novel  
632 sulfite dehydrogenase in Roseobacters” in *EMBO Workshop on Microbial Sulfur*  
633 *Metabolism*, G. Muyzer, A. J. Stams, Eds. (Sieca Repro, 2012), p. 29.
- 634 37. S. Lenk, *et al.*, *Roseobacter* clade bacteria are abundant in coastal sediments and encode a  
635 novel combination of sulfur oxidation genes. *ISME J.* **6**, 2178–2187 (2012).
- 636 38. A. Wären, P. Bouchet, New records, species, genera, and a new family of gastropods from  
637 hydrothermal vents and hydrocarbon seeps. *Zool. Scr.* **22**, 1–90 (1993).
- 638 39. M. Perez, S. K. Juniper, Insights into symbiont population structure among three  
639 vestimentiferan tubeworm host species at Eastern Pacific spreading centers. *Appl. Environ.*  
640 *Microbiol.* **82**, 5197–5205 (2016).
- 641 40. T. Ikuta, *et al.*, Heterogeneous composition of key metabolic gene clusters in a vent mussel  
642 symbiont population. *ISME J.* **10**, 990–1001 (2016).
- 643 41. R. Ansoerge, *et al.*, Functional diversity enables multiple symbiont strains to coexist in  
644 deep-sea mussels. *Nat. Microbiol.* **4**, 2487–2497 (2019).
- 645 42. M.-A. Cambon-Bonavita, J. Aubé, V. Cuffe-Gauchard, J. Reveillaud, Niche partitioning in  
646 the *Rimicaris exoculata* holobiont: the case of the first symbiotic Zetaproteobacteria.  
647 *Microbiome* **9**, 87 (2021).
- 648 43. J. Zimmermann, *et al.*, Dual symbiosis with co-occurring sulfur-oxidizing symbionts in  
649 vestimentiferan tubeworms from a Mediterranean hydrothermal vent. *Environ. Microbiol.*  
650 **16**, 3638–3656 (2014).

- 651 44. S. Mitarai, H. Watanabe, Y. Nakajima, A. F. Shchepetkin, J. C. McWilliams, Quantifying  
652 dispersal from hydrothermal vent fields in the western Pacific Ocean. *Proc. Natl. Acad.*  
653 *Sci. USA* **113**, 2976–2981 (2016).
- 654 45. L. A. Levin, D. J. Amon, H. Lily, Challenges to the sustainability of deep-seabed mining.  
655 *Nat. Sustain.* **3**, 784–794 (2020).
- 656 46. F. Blanquart, O. Kaltz, S. L. Nuismer, S. Gandon, A practical guide to measuring local  
657 adaptation. *Ecol. Lett.* **16**, 1195–1205 (2013).
- 658 47. L. M. Schiebelhut, M. N. Dawson, Correlates of population genetic differentiation in  
659 marine and terrestrial environments. *J. Biogeogr.* **45**, 2427–2441 (2018).
- 660 48. S. L. Seston, *et al.*, Metatranscriptional response of chemoautotrophic *Ifremeria nautilei*  
661 endosymbionts to differing sulfur regimes. *Front. Microbiol.* **7**, 1074 (2016).
- 662 49. L. Song, L. Florea, Rcorrector: efficient and accurate error correction for Illumina RNA-  
663 seq reads. *GigaScience* **4**, 48 (2015).
- 664 50. M. G. Grabherr, *et al.*, Full-length transcriptome assembly from RNA-Seq data without a  
665 reference genome. *Nat. Biotechnol.* **29**, 644–652 (2011).
- 666 51. J. G. Sanders, R. A. Beinart, F. J. Stewart, E. F. Delong, P. R. Girguis,  
667 Metatranscriptomics reveal differences in in situ energy and nitrogen metabolism among  
668 hydrothermal vent snail symbionts. *ISME J.* **7**, 1556–1567 (2013).
- 669 52. W. Li, A. Godzik, Cd-hit: a fast program for clustering and comparing large sets of protein  
670 or nucleotide sequences. *Bioinformatics* **22**, 1658–1659 (2006).
- 671 53. D. R. Laetsch, M. L. Blaxter, BlobTools: interrogation of genome assemblies. *F1000Res* **6**,  
672 1287 (2017).
- 673 54. M. Seppey, M. Manni, E. M. Zdobnov, “BUSCO: Assessing Genome Assembly and  
674 Annotation Completeness” in *Gene Prediction*, M. Kollmar, Ed. (Springer New York,  
675 2019), pp. 227–245.
- 676 55. A. M. Bolger, M. Lohse, B. Usadel, Trimmomatic: a flexible trimmer for Illumina  
677 sequence data. *Bioinformatics* **30**, 2114–2120 (2014).
- 678 56. A. Bankevich, *et al.*, SPAdes: A new genome assembly algorithm and its applications to  
679 single-cell sequencing. *J. Comput. Biol.* **19**, 455–477 (2012).
- 680 57. S. Nurk, D. Meleshko, A. Korobeynikov, P. A. Pevzner, metaSPAdes: a new versatile  
681 metagenomic assembler. *Genome Res.* **27**, 824–834 (2017).
- 682 58. B. K. B. Seah, H. R. Gruber-Vodicka, gbtools: interactive visualization of metagenome  
683 bins in R. *Front. Microbiol.* **6**, 1451 (2015).
- 684 59. G.-C. Xu, *et al.*, LR\_Gapcloser: a tiling path-based gap closer that uses long reads to  
685 complete genome assembly. *GigaScience* **8**, giy157 (2019).
- 686 60. C. T. Brown, *et al.*, Unusual biology across a group comprising more than 15% of domain  
687 Bacteria. *Nature* **523**, 208–211 (2015).
- 688 61. J. Luo, *et al.*, SLR: a scaffolding algorithm based on long reads and contig classification.  
689 *BMC Bioinformatics* **20**, 539 (2019).
- 690 62. L.-X. Chen, K. Anantharaman, A. Shaiber, A. M. Eren, J. F. Banfield, Accurate and  
691 complete genomes from metagenomes. *Genome Res.* **30**, 315–333 (2020).
- 692 63. D. D. Kang, *et al.*, MetaBAT 2: an adaptive binning algorithm for robust and efficient  
693 genome reconstruction from metagenome assemblies. *PeerJ* **7**, e7359 (2019).
- 694 64. Y.-W. Wu, B. A. Simmons, S. W. Singer, MaxBin 2.0: an automated binning algorithm to  
695 recover genomes from multiple metagenomic datasets. *Bioinformatics* **32**, 605–607 (2016).

- 696 65. B. J. Walker, *et al.*, Pilon: an integrated tool for comprehensive microbial variant detection  
697 and genome assembly improvement. *PLoS ONE* **9**, e112963 (2014).
- 698 66. T. Brettin, *et al.*, RASTtk: A modular and extensible implementation of the RAST  
699 algorithm for building custom annotation pipelines and annotating batches of genomes. *Sci.*  
700 *Rep.* **5**, 8365 (2015).
- 701 67. D. H. Parks, M. Imelfort, C. T. Skennerton, P. Hugenholtz, G. W. Tyson, CheckM:  
702 assessing the quality of microbial genomes recovered from isolates, single cells, and  
703 metagenomes. *Genome Res.* **25**, 1043–1055 (2015).
- 704 68. A. Gurevich, V. Saveliev, N. Vyahhi, G. Tesler, QUAST: quality assessment tool for  
705 genome assemblies. *Bioinformatics* **29**, 1072–1075 (2013).
- 706 69. S. Picelli, *et al.*, Tn5 transposase and tagmentation procedures for massively scaled  
707 sequencing projects. *Genome Res.* **24**, 2033–2040 (2014).
- 708 70. A. Wilm, *et al.*, LoFreq: a sequence-quality aware, ultra-sensitive variant caller for  
709 uncovering cell-population heterogeneity from high-throughput sequencing datasets.  
710 *Nucleic Acids Res.* **40**, 11189–11201 (2012).
- 711 71. T. S. Korneliusson, A. Albrechtsen, R. Nielsen, ANGSD: Analysis of Next Generation  
712 Sequencing Data. *BMC Bioinformatics* **15**, 356 (2014).
- 713 72. E. Garrison, G. Marth, Haplotype-based variant detection from short-read sequencing.  
714 arXiv [Preprint] (2012) <https://arxiv.org/abs/1207.3907> (August 11, 2021).
- 715 73. H. Li, *et al.*, The Sequence Alignment/Map format and SAMtools. *Bioinformatics* **25**,  
716 2078–2079 (2009).
- 717 74. P. Danecek, *et al.*, The variant call format and VCFtools. *Bioinformatics* **27**, 2156–2158  
718 (2011).
- 719 75. G. A. V. de Auwera, B. D. O’Connor, *Genomics in the Cloud: Using Docker, GATK, and*  
720 *WDL in Terra*, First edition (O’Reilly, 2020).
- 721 76. E. Paradis, K. Schliep, ape 5.0: an environment for modern phylogenetics and evolutionary  
722 analyses in R. *Bioinformatics* **35**, 526–528 (2019).
- 723 77. R Core Team, *R: A language and environment for statistical computing* (R Foundation for  
724 Statistical Computing, Vienna, Austria, 2020).
- 725 78. F. Cailliez, The analytical solution of the additive constant problem. *Psychometrika* **48**,  
726 305–308 (1983).
- 727 79. H. Wickham, *ggplot2: Elegant Graphics for Data Analysis* (Springer New York, 2016).
- 728 80. G. Bhatia, N. Patterson, S. Sankararaman, A. L. Price, Estimating and interpreting F<sub>ST</sub>:  
729 The impact of rare variants. *Genome Res.* **23**, 1514–1521 (2013).
- 730 81. M. C. Whitlock, K. E. Lotterhos, Reliable detection of loci responsible for local adaptation:  
731 inference of a null model through trimming the distribution of F<sub>ST</sub>. *Am. Nat.* **186**, S24–S36  
732 (2015).
- 733 82. S. Purcell, *et al.*, PLINK: a tool set for whole-genome association and population-based  
734 linkage analyses. *Am. J. Hum. Genet.* **81**, 559–575 (2007).
- 735 83. F. Beghini, *et al.*, Integrating taxonomic, functional, and strain-level profiling of diverse  
736 microbial communities with bioBakery 3. *eLife* **10**, e65088 (2021).
- 737 84. R. Patro, G. Duggal, M. I. Love, R. A. Irizarry, C. Kingsford, Salmon provides fast and  
738 bias-aware quantification of transcript expression. *Nat. Methods* **14**, 417–419 (2017).
- 739 85. M. D. Robinson, A. Oshlack, A scaling normalization method for differential expression  
740 analysis of RNA-seq data. *Genome Biol.* **11**, R25 (2010).

- 741 86. Z. Gu, R. Eils, M. Schlesner, Complex heatmaps reveal patterns and correlations in  
742 multidimensional genomic data. *Bioinformatics* **32**, 2847–2849 (2016).
- 743 87. J. Oksanen, *et al.*, *vegan: Community Ecology Package* (2020). [https://CRAN.R-](https://CRAN.R-project.org/package=vegan)  
744 [project.org/package=vegan](https://CRAN.R-project.org/package=vegan). Deposited 28 November 2020.
- 745 88. R. J. Hijmans, *geosphere: Spherical Trigonometry* (2019). [https://CRAN.R-](https://CRAN.R-project.org/package=geosphere)  
746 [project.org/package=geosphere](https://CRAN.R-project.org/package=geosphere). Deposited 26 May 2019.
- 747 89. B. R. Forester, J. R. Lasky, H. H. Wagner, D. L. Urban, Comparing methods for detecting  
748 multilocus adaptation with multivariate genotype-environment associations. *Mol. Ecol.* **27**,  
749 2215–2233 (2018).
- 750 90. M. J. Mottl, *et al.*, Chemistry of hot springs along the Eastern Lau Spreading Center.  
751 *Geochim. Cosmochim. Acta* **75**, 1013–1038 (2011).
- 752 91. G. E. Flores, *et al.*, Inter-field variability in the microbial communities of hydrothermal  
753 vent deposits from a back-arc basin: Microbial communities of hydrothermal deposits.  
754 *Geobiology* **10**, 333–346 (2012).
- 755 92. P. Cingolani, *et al.*, A program for annotating and predicting the effects of single  
756 nucleotide polymorphisms, SnpEff: SNPs in the genome of *Drosophila melanogaster*  
757 strain w<sup>1118</sup>; iso-2; iso-3. *Fly* **6**, 80–92 (2012).

758 **Figures and Tables**  
759

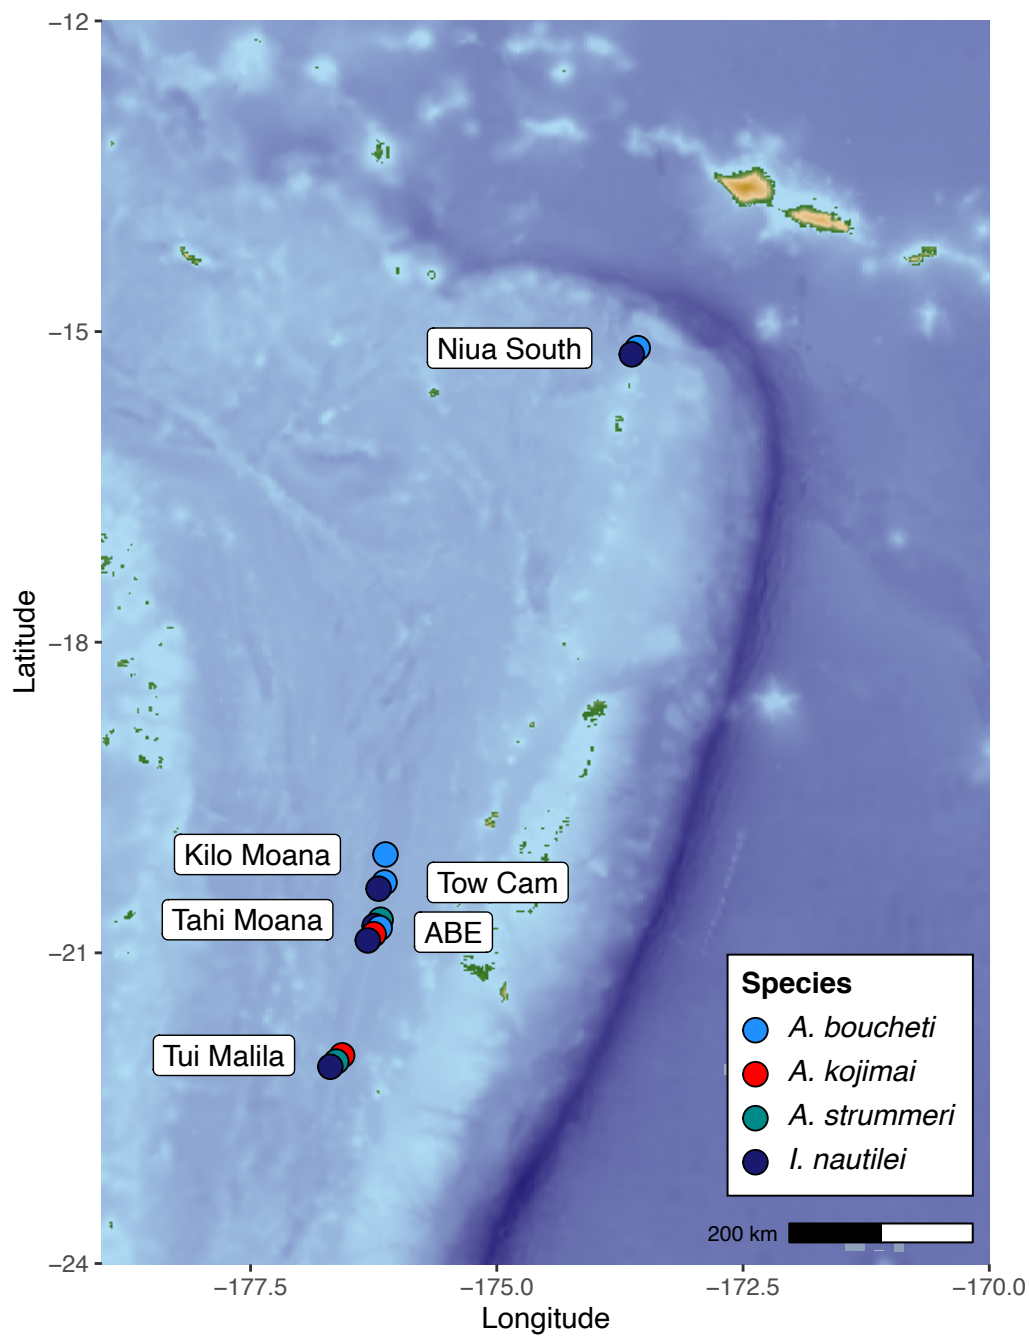

760 **Figure 1** Sampling map for *Alviniconcha* and *Ifremeria* species in the Eastern Lau Spreading Center and Tonga  
761 Volcanic Arc.  
762



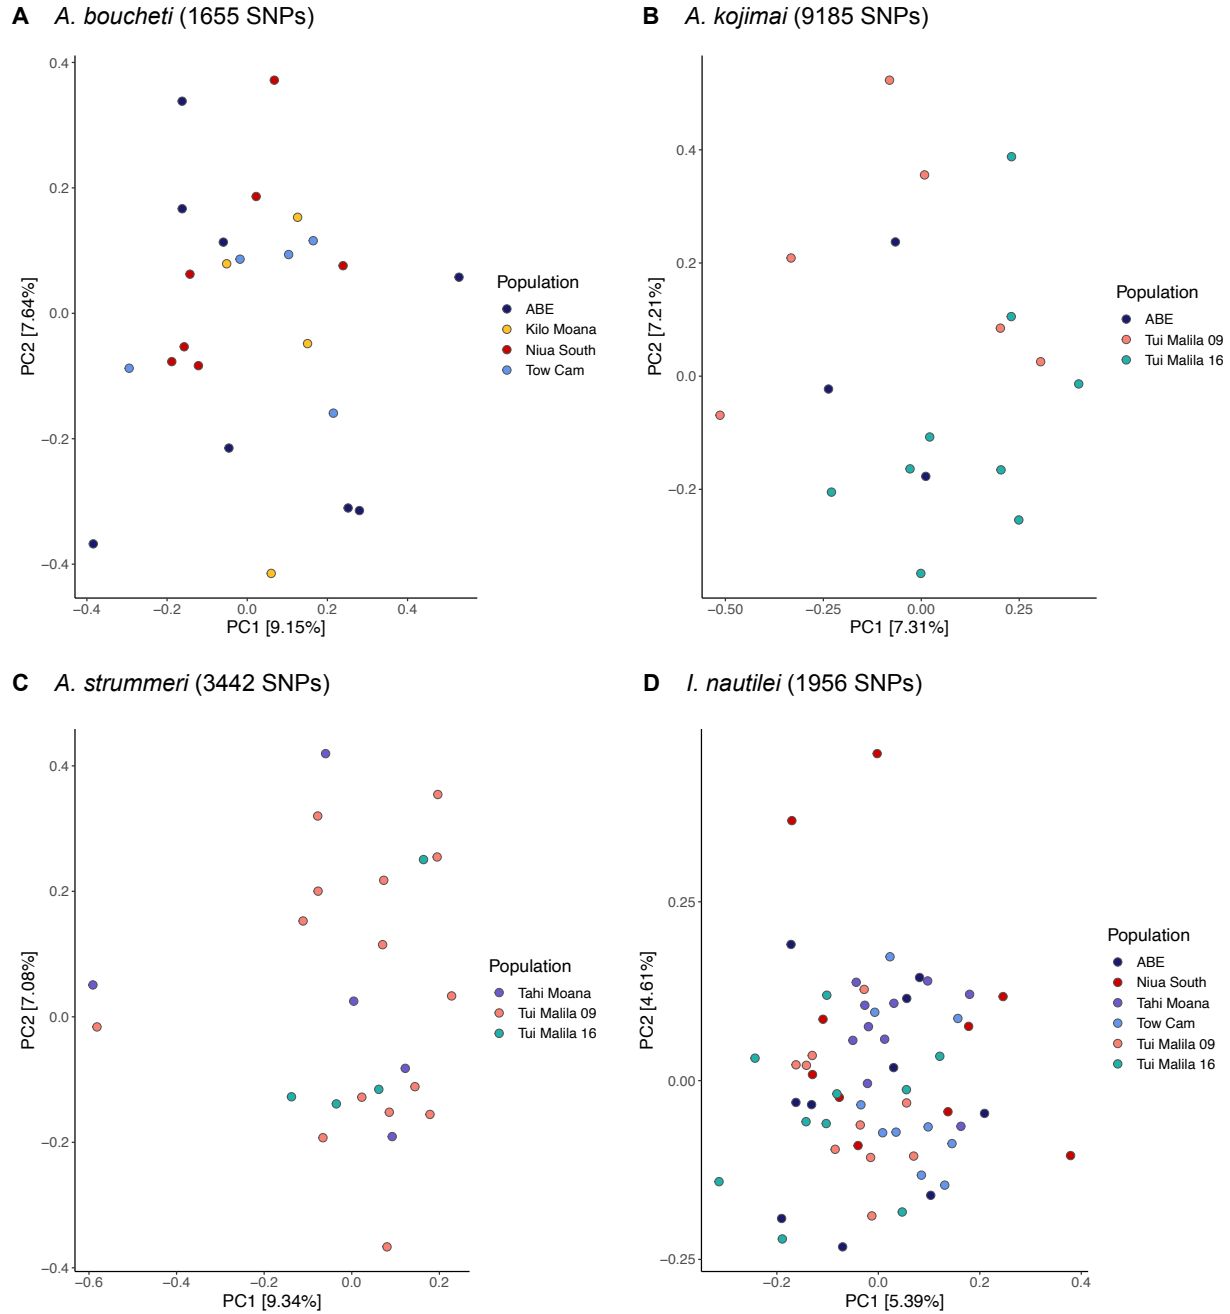

763  
764  
765

**Figure 2** Principal component plots for *Alviniconcha* and *Ifremeria* host species based on genetic covariance matrices.

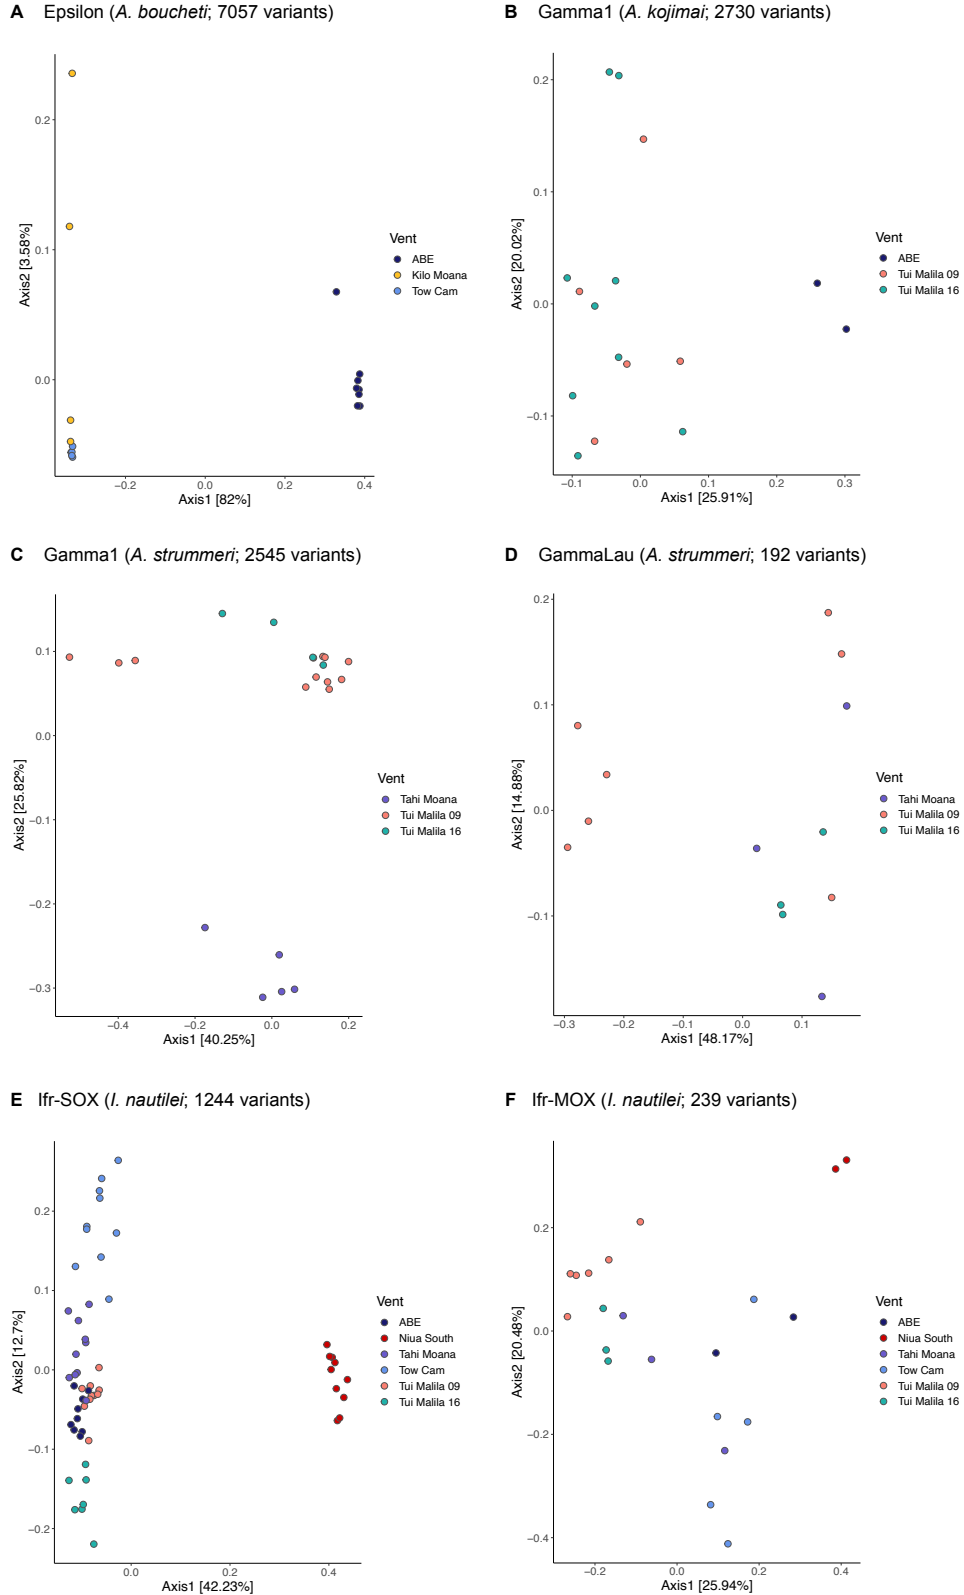

766  
767  
768  
769

**Figure 3** Principal coordinate plots for *Alviniconcha* and *Ifremeria* symbionts based on relative allele counts transformed into Bray-Curtis dissimilarities. Allele counts approximate the relative proportions of different symbiont strains within host individuals.

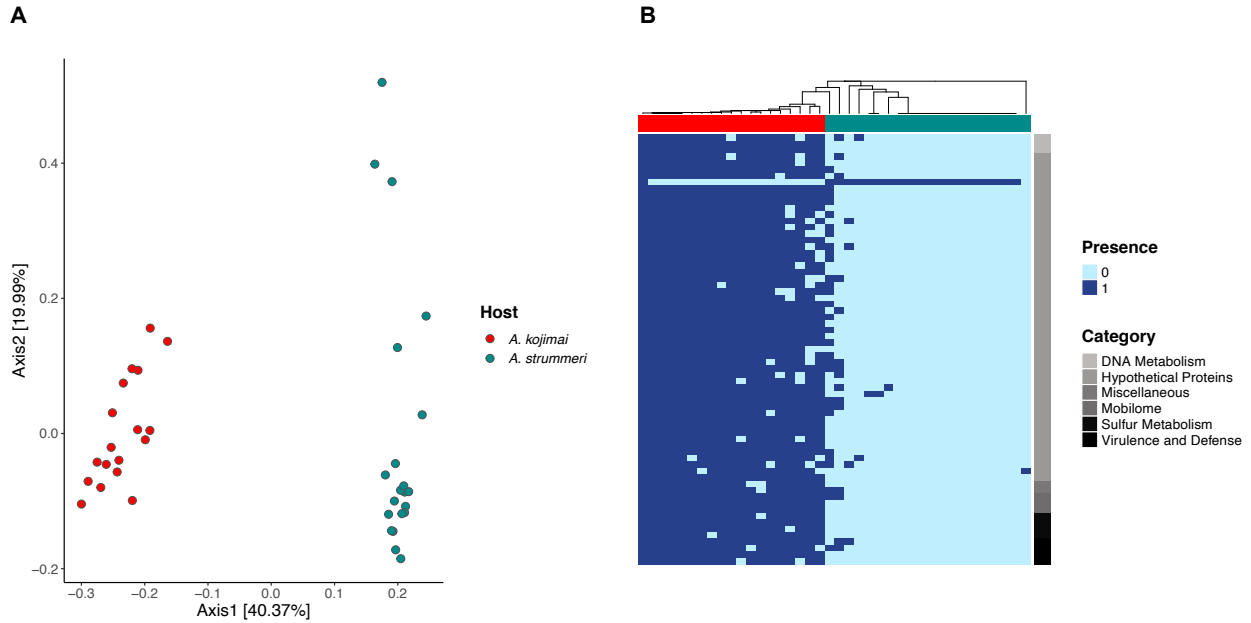

770  
771  
772  
773  
774  
775  
776  
777  
778

**Figure 4** Principal coordinate plot based on Bray-Curtis dissimilarities (A) and presence/absence heatmap of differentially preserved genes (B) for the Gamma1 symbiont of *A. kojimai* and *A. strummeri*. Strains of this symbiont are clearly distinct between the two host species, even when these taxa co-occur (see Fig. S3). Segregation of symbiont populations by host species along the first ordination axis suggests that host affinity is a stronger predictor than geography for symbiont composition between species. Dark and light blue colors in the heatmap indicate presence and absence of genes, respectively. Dendrograms show similarities between samples based on their gene content profiles.

**A** Epsilon (*A. boucheti*; 30 genes)

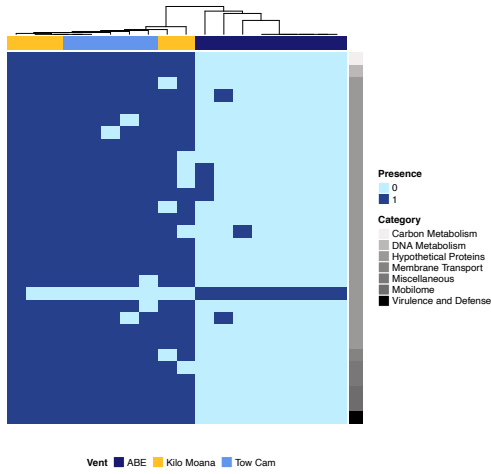

**B** Gamma1 (*A. kojimai*; 99 genes)

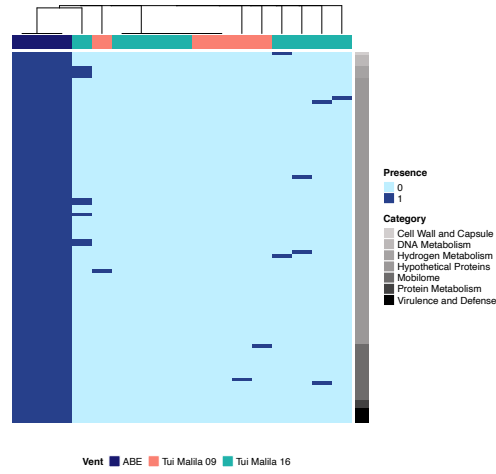

**C** Gamma1 (*A. strummeri*; 71 genes)

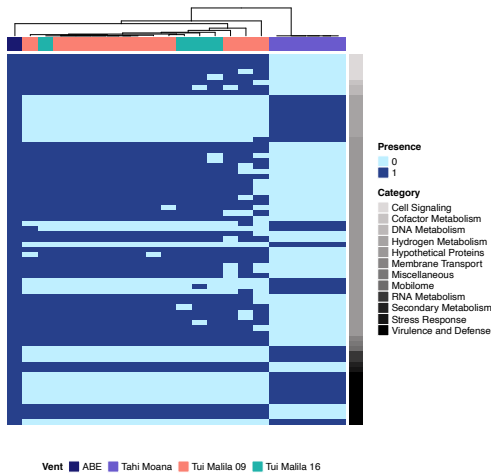

**D** GammaLau (*A. strummeri*; 113 genes)

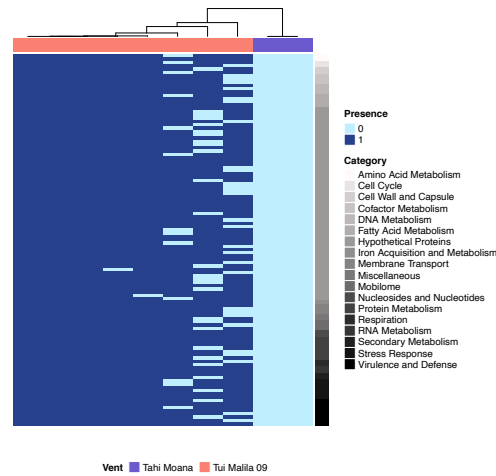

**E** Ifr-SOX (*I. nautilei*; 100 genes)

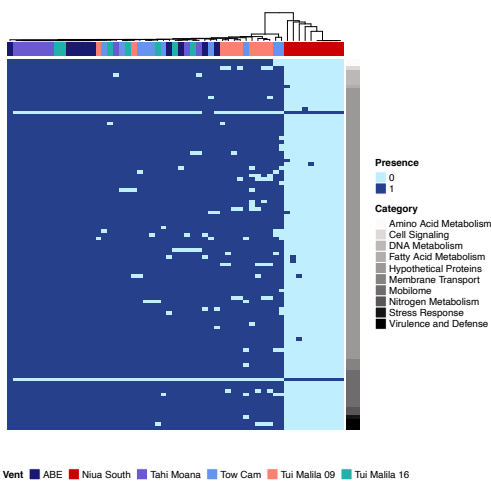

**E** Ifr-MOX (*I. nautilei*; 145 genes)

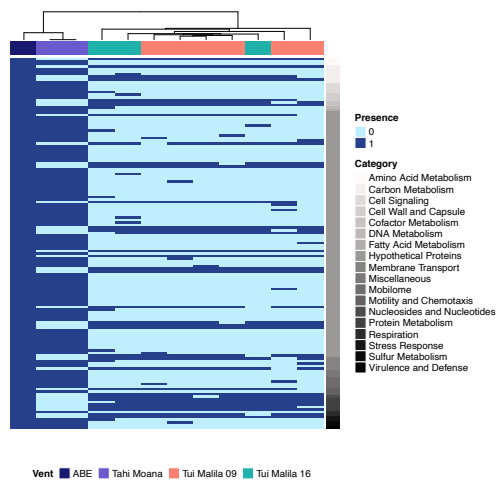

779  
780

**Figure 5** Presence/absence heatmap for differentially preserved genes.

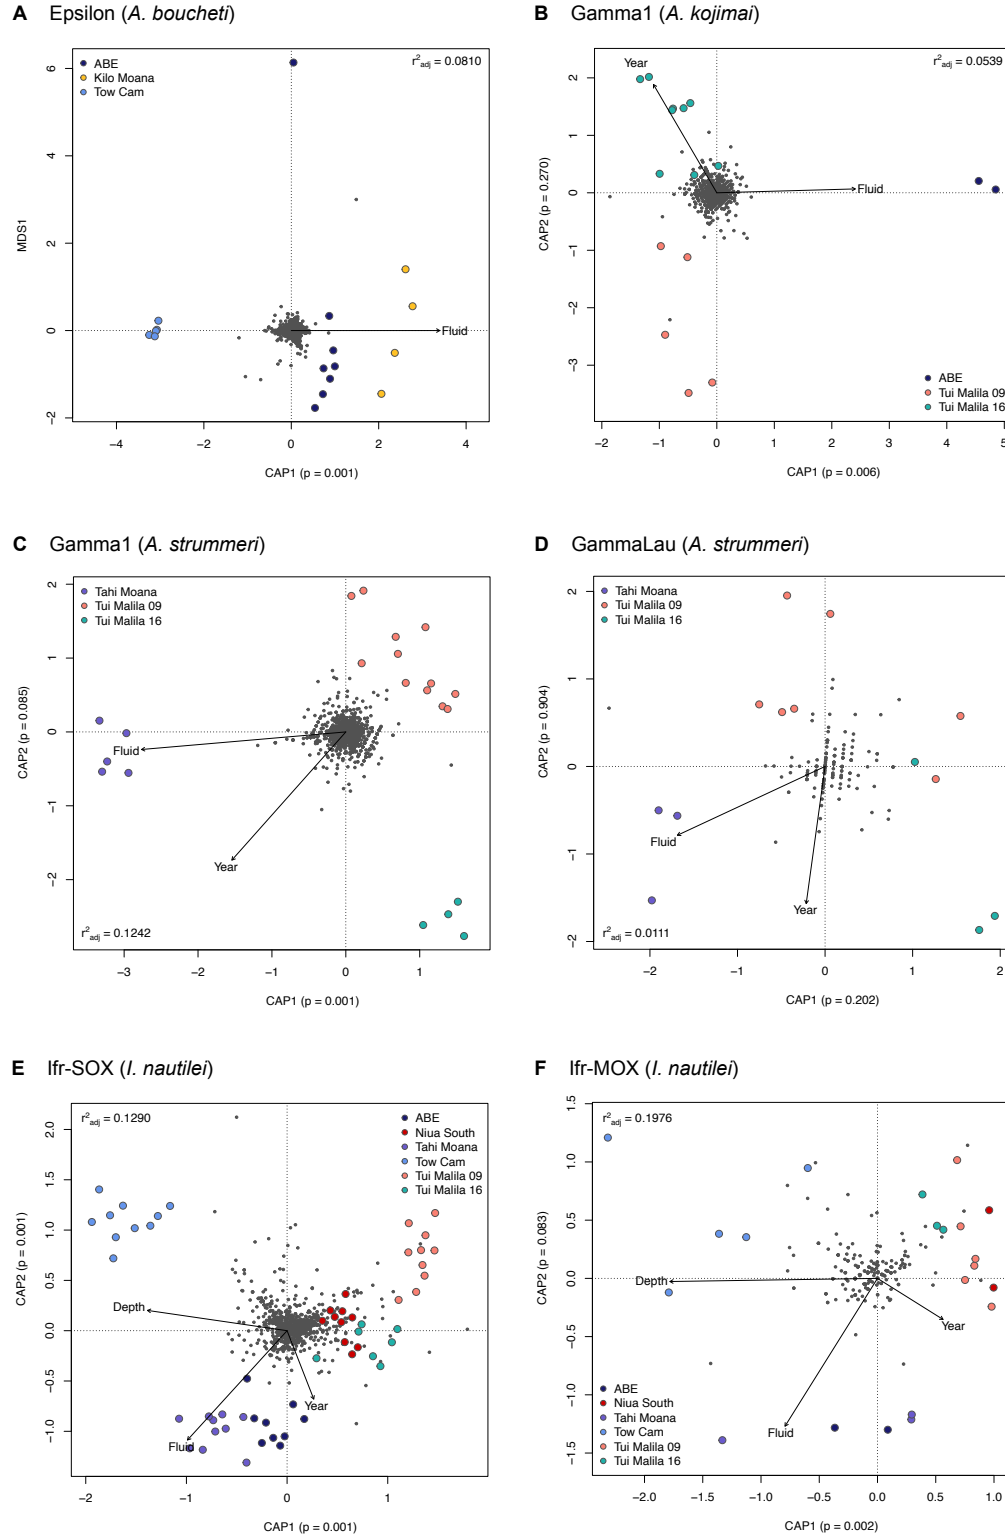

781  
 782 **Figure 6** Redundancy analysis plots of the first two ordination axes for *Alviniconcha* and *Ifremeria* symbionts.  
 783 Small grey dots in the center of the plot indicate genetic variants, while large colored dots represent intra-host  
 784 symbiont populations sampled from different vent localities. Vectors show the environmental predictors.  
 785 Redundancy analyses were conditioned by geography for all symbionts except for Gamma1 and GammaLau.  
 786 Genotype-environment associations were not significant for GammaLau.

**Table 1** Sampling information for *Alviniconcha* and *Ifremeria* species from the Eastern Lau Spreading Center and Tonga Volcanic Arc. Chemical concentrations are mean endmember values for each vent field obtained from Beinart et al. [23], Mottl et al. [88], Flores et al. [89], and unpublished data provided by J. Seewald (Woods Hole Oceanographic Institution) and A. Diehl (MARUM). n.a. = not available.

| Vent site                    | Species                                                         | Coordinates               | Year         | Depth [m] | H <sub>2</sub> [mM] | CO <sub>2</sub> [mM] | CH <sub>4</sub> [mM] | H <sub>2</sub> S [mM] | Fe [mM] | Mn [mM] |
|------------------------------|-----------------------------------------------------------------|---------------------------|--------------|-----------|---------------------|----------------------|----------------------|-----------------------|---------|---------|
| Tonga Volcanic Arc           |                                                                 |                           |              |           |                     |                      |                      |                       |         |         |
| Niua South                   | <i>A. boucheti</i><br><i>I. nautiliei</i>                       | 15°09.79'S<br>173°34.48'W | 2016         | 1164      | 0.037               | n.a.                 | 0.005                | 1.911                 | n.a.    | n.a.    |
| Eastern Lau Spreading Center |                                                                 |                           |              |           |                     |                      |                      |                       |         |         |
| Kilo Moana                   | <i>A. boucheti</i>                                              | 20°03.23'S<br>176°08.01'W | 2009         | 2614      | 0.382               | 8.227                | 0.031                | 5.432                 | 3.062   | 0.643   |
| Tow Cam                      | <i>A. boucheti</i><br><i>I. nautiliei</i>                       | 20°18.97'S<br>176°08.19'W | 2009         | 2711–2722 | 0.150               | 10.648               | 0.045                | 4.795                 | 0.316   | 0.389   |
| Tahi Moana                   | <i>A. strummeri</i><br><i>I. nautiliei</i>                      | 20°40.94'S<br>176°11.01'W | 2016         | 2234–2273 | 0.097               | 7.191                | 0.038                | 3.548                 | 0.286   | 0.525   |
| ABE                          | <i>A. boucheti</i><br><i>A. kojimai</i><br><i>I. nautiliei</i>  | 20°45.79'S<br>176°11.47'W | 2009<br>2016 | 2130–2152 | 0.079               | 5.980                | 0.048                | 3.060                 | 0.245   | 0.330   |
| Tu'i Malila                  | <i>A. kojimai</i><br><i>A. strummeri</i><br><i>I. nautiliei</i> | 21°59.36'S<br>176°34.10'W | 2009<br>2016 | 1860–1887 | 0.084               | 12.912               | 0.037                | 2.294                 | 0.203   | 0.406   |
